1 **The complete mitogenome of *Lysmata vittata* (Crustacea:**  
2 **Decapoda: Hippolytidae) and its phylogenetic position in**  
3 **Decapoda**

4 **Longqiang Zhu<sup>1,2,3</sup>, Zhihuang Zhu<sup>1,2\*</sup>, Leiyu Zhu<sup>1,2</sup>, Dingquan Wang<sup>3</sup>, Jianxin**  
5 **Wang<sup>3\*</sup>, Qi Lin<sup>1,2,3\*</sup>**

6 <sup>1</sup> Fisheries Research Institute of Fujian, Xiamen, China

7 <sup>2</sup> Key Laboratory of Cultivation and High-value Utilization of Marine Organisms in Fujian Province, Xiamen,  
8 China

9 <sup>3</sup>Marine Microorganism Ecological & Application Lab, Zhejiang Ocean University, Zhejiang, China

10 \* xmqilin@sina.com (QL); jxwang@zjou.edu.cn (JW); zhu.zhi.huang@163.com (ZZ)

11

12 **Abstract**

13 In this study, the complete mitogenome of *Lysmata vittata* (Crustacea: Decapoda:  
14 Hippolytidae) has been determined. The genome sequence was 22003 base pairs (bp)  
15 and it included thirteen protein-coding genes (PCGs), twenty-two transfer RNA genes  
16 (tRNAs), two ribosomal RNA genes (rRNAs) and three putative control regions  
17 (CRs). The nucleotide composition of AT was 71.50%, with a slightly negative AT  
18 skewness (-0.04). Usually the standard start codon of the PCGs was ATN, while *coxI*,  
19 *nad4L* and *cox3* began with TTG, TTG and GTG. The canonical termination codon  
20 was TAA, while *nad5* and *nad4* ended with incomplete stop codon T, and *coxI* ended  
21 with TAG. We compared the order of genes of Decapoda ancestor and found that the  
22 positions of the two tRNAs genes (*trnA* and *trnR*) of the *L. vittata* were translocated.  
23 The phylogenetic tree showed that *L. vittata* was an independent clade, namely  
24 Hippolytidae.

25 **Introduction**

26 *Lysmata vittata* (Crustacea: Decapoda: Hippolytidae) belongs to a small marine  
27 ornamental shrimp, commonly known as peppermint shrimp, which is popular in the  
28 marine aquarium trade. The species has a special sexual system, ie, protandric  
29 simultaneous hermaphrodite (PSH) [1]. It is a member of the clean shrimp family, a  
30 common marine ornamental species that originated in the Indian Ocean-Pacific region,  
31 including coastal areas such as China, Japan, Philippines and Australia [2-4]. *L.*  
32 *vittata* prefers to move in the range of 2~50 m below the sea surface, usually hiding in

33 the reef during the day and activating at night [5]. In view of the research needs of *L.*  
34 *vittata*, we sequenced its mitogenome sequence.

35 The mitogenome is a significant tool for studying identification and phylogenetic  
36 relationships in the different species [6]. In shrimps, the mitochondria is maternally  
37 inherited, usually is circular and approximately 15 to 20 kb in length, including  
38 thirteen PCGs, two rRNAs, twenty-two tRNAs and one CR. The mitogenome is a  
39 complete system, which not only contains abundant information, but also the  
40 phylogenetic tree based on the genome has the advantages of stable and reliable  
41 structure.

42 Decapoda includes the largest number of species in crustaceans (8000 ~ 10000  
43 species), with the greatest economic value and the most widely known invertebrates  
44 [7]. It includes many aquatic products with important economic value, such as  
45 lobsters, prawns and crabs. Therefore, the phylogeny and classification of decapod  
46 crustaceans have been the focus of research for many years. The classification of  
47 Hippolytidae was the most controversial family in Decapoda, especially the  
48 monophyly of Hippolytidae and the position of the genus *Lysmata* [1, 8]. The  
49 Hippolytidae is an important group of marine benthic organisms and a common group  
50 in shallow sea biomes. Most species of the Hippolytidae are small shrimps living in  
51 shallow water, which are distributed worldwide. It occupies an important position in  
52 the animal classification system. However, we are the first to publish the  
53 mitochondrial genome sequence of the Hippolytidae species in the GenBank database,  
54 which is of great significance for us to expand the database of Hippolytidae.

55 In this study, the mitogenome of *L. vittata* has been successfully determined, which  
56 helps us to understand the characteristics of mtDNA of *L. vittata*. Furthermore,  
57 phylogenetic analysis using the nucleotide and amino acid sequences of thirteen PCGs  
58 helps us to reconstruct the phylogenetic relationship between *L. vittata* and related  
59 species. The addition of newly determined mitogenome complements the record of  
60 the mitochondrial gene library of Hippolytidae from scratch.

## 61 **Materials and methods**

### 62 **Mitochondria DNA sequencing and genome assembly**

63 Specimens of *L. vittata* were collected in Xiamen, Fujian province, China. The  
64 morphological characteristics of the species follow the previous description of  
65 Abdelsalam [9]. Approximately 5g of fresh leaves was harvested for mtDNA isolation  
66 using an improved extraction method [10]. After DNA isolation, the isolated DNA

67 was purified according to manufacturer's instructions (Illumina), and then 1 µg was  
68 taken to create short-insert libraries, whose insertion size was 430 bp, followed by  
69 sequencing on the Illumina Hiseq 4000 [11] (Shanghai BIOZERON Co., Ltd). The  
70 high molecular weight DNA was purified and used for PacBio library prep,  
71 BluePippin size selection, then sequenced on the Sequel Sequencer.  
72 The raw data obtained by sequencing was processed and then the duplicated  
73 sequences were assembled. The mitogenome was reconstructed using a combination  
74 of the PacBio Sequel and the Illumina Hiseq data. Assemble the genome framework  
75 by the both Illumina and PacBio using SOAPdenovo2.04 [12]. Verifying the  
76 assembly and completing the circle or linear characteristic of the mitogenome, filling  
77 gaps if there were. Finally, the clean data were mapped to the assembled draft  
78 mitogenome to correct the wrong bases, and the most of the gaps were filled through  
79 local assembly.

## 80 **Validation of mitogenome data**

81 In order to ensure the accuracy of the *L. vittata* mitogenome data, we resequenced the  
82 samples on the Illumina HiSeq X10 platform (Nanjing Genepioneer Biotechnologies  
83 Co. Ltd).

## 84 **Genome annotation and sequence analysis**

85 Mitogenome sequences were annotated using homology-based prediction and de novo  
86 prediction, and the EVidenceModeler v1.1 [13] was used to integrate the complete  
87 genetic structure. Twenty-two tRNAs and two rRNAs were predicted by  
88 tRNAscan-SE [14] and rRNAmmer 1.2 [15]. The circular of the complete *L. vittata*  
89 mitogenome graphical map was drawn using OrganellarGenomeDRAW v1.2 [16].  
90 The RSCU of thirteen PCGs (remove incomplete codons) was calculated using  
91 MEGA 5.0 [17]. The composition skewness of each component of the genome was  
92 calculated according to the following formulas: AT-skew =  $(A-T) / (A+T)$ ; GC-skew  
93 =  $(G-C) / (G+C)$  [18]. The secondary cloverleaf structure of tRNAs was examined  
94 with MITOS WebServer (<http://mitos2.bioinf.uni-leipzig.de/index.py>) [19].

## 95 **Phylogenetic analysis**

96 To reconstruct the phylogenetic relationship among shrimp, the PCGs sequences of  
97 the 51 Decapoda species were downloaded from GenBank database (S1 Table). The  
98 PCGs sequences of *Euphausia superba* (NC\_040987.1) were used as outgroup. The  
99 nucleotide and amino acid sequences of 13 PCGs were aligned using MEGA 5.0 [17].

100 Gblocks was used to identify and selected the conserved regions [20]. Subsequently,  
101 Bayesian inference (BI) and Maximum likelihood (ML) analysis were utilized for  
102 reconstructing phylogenetic tree by MrBayes v3.2.6 [21] and PhyML 3.1 [22].  
103 According to the Akaike Information Criterion (AIC) [23], GTR + I + G model was  
104 considered as the best-fit model for analysis with nucleotide alignments using  
105 jModeltest [24], and MtArt + I + G + F model was the optimal model for the amino  
106 acid sequence dataset using ProtTest 3.4.2 [25]. In BI analysis, two simultaneous runs  
107 of 10000000 generations were conducted for the matrix. Sampling trees every 1000  
108 generations, and diagnostics were calculated every 5000 generations, with three  
109 heated and one cold chains to encourage swapping among the Markov-chain Monte  
110 Carlo (MCMC) chains. Additionally, the standard deviation of split frequencies was  
111 below 0.01 after 10000000 generations, and the potential scale reduction factor (PSRF)  
112 was close to 1.0 for all parameters. Posterior probabilities over 0.9 or bootstrap  
113 percentage over 75%, the results were regarded as credible [26, 27]. The resulting  
114 phylogenetic trees were visualized in Fig Tree v1.4.0.

## 115 **Results and discussion**

### 116 **Genome structure, organization and composition**

117 The mitogenome of *L. vittata* was a typical circular molecule of 22003 bp in size. It  
118 contained 37 mitochondrial genes (thirteen PCGs, twenty-two tRNAs, two rRNAs and  
119 three CRs) (Fig 1 and S2 Table). Among the 37 genes, the coding direction of the  
120 twenty-three genes was clockwise (F-strand), and the coding direction of the  
121 remaining fourteen genes was counterclockwise (R-strand) (Fig 1 and S2 Table). The  
122 nucleotide composition of the mitogenome was biased toward A and T (T=37.15%,  
123 A=34.35%, C=16.69%, G=11.80%) (Table 1). The relatively AT contents of the  
124 complete mitogenome were calculated [mitogenome (71.50%), PCGs (69.79%),  
125 tRNAs (69.58%) and rRNAs (69.29%)] (Table 1). The AT-skew values (-0.04) and  
126 GC-skew values (-0.17) for the entire mitogenome were negative, showing that there  
127 were higher Ts than As and Cs than Gs (Table 1). All original sequence data in this  
128 study were submitted to the NCBI database under accession number MT478132.

129

130 **Fig 1. Mitogenome map of *Lysmata vittata*.** The genes outside the map were coded on the F  
131 strand, whereas the genes on the inside of the map are coded on the R strand. The middle black  
132 circle displays the GC content and the inside purple and green circle displays the GC skew.

133

134 **Table 1. Composition and skewness of *Lysmata vittata* mitogenome.**

| <i>Lysmata vittata</i> | Size(bp) | T (%) | C (%) | A (%) | G (%) | A+T (%) | AT-skew | GC-skew |
|------------------------|----------|-------|-------|-------|-------|---------|---------|---------|
| Mitogenome             | 22003    | 37.15 | 16.69 | 34.35 | 11.80 | 71.50   | -0.04   | -0.17   |
| PCGs                   | 11144    | 41.09 | 15.25 | 28.70 | 14.96 | 69.79   | -0.18   | -0.01   |
| <i>atp6</i>            | 675      | 40.15 | 19.41 | 28.30 | 12.15 | 68.44   | -0.17   | -0.23   |
| <i>atp8</i>            | 165      | 43.64 | 15.76 | 35.15 | 5.45  | 78.79   | -0.11   | -0.49   |
| <i>cob</i>             | 1137     | 39.40 | 20.14 | 27.88 | 12.58 | 67.28   | -0.17   | -0.23   |
| <i>cox1</i>            | 1614     | 37.73 | 17.91 | 27.76 | 16.60 | 65.49   | -0.15   | -0.04   |
| <i>cox2</i>            | 693      | 37.95 | 19.77 | 28.43 | 13.85 | 66.38   | -0.14   | -0.18   |
| <i>cox3</i>            | 756      | 39.29 | 18.25 | 27.91 | 14.55 | 67.20   | -0.17   | -0.11   |
| <i>nad1</i>            | 927      | 44.01 | 10.79 | 27.29 | 17.91 | 71.31   | -0.23   | 0.25    |
| <i>nad2</i>            | 1005     | 43.28 | 18.01 | 29.05 | 9.65  | 72.34   | -0.20   | -0.30   |
| <i>nad3</i>            | 354      | 42.66 | 18.93 | 26.27 | 12.15 | 68.93   | -0.24   | -0.22   |
| <i>nad4</i>            | 1336     | 43.11 | 9.51  | 28.59 | 18.79 | 71.70   | -0.20   | 0.33    |
| <i>nad4l</i>           | 246      | 45.12 | 7.72  | 26.02 | 21.14 | 71.14   | -0.27   | 0.46    |
| <i>nad5</i>            | 1732     | 41.17 | 9.82  | 31.64 | 17.38 | 72.81   | -0.13   | 0.26    |
| <i>nad6</i>            | 504      | 44.64 | 17.06 | 28.57 | 9.72  | 73.21   | -0.22   | -0.27   |
| tRNAs                  | 1512     | 33.27 | 14.02 | 36.31 | 16.40 | 69.58   | 0.04    | 0.08    |
| rRNAs                  | 2315     | 32.40 | 11.88 | 36.89 | 18.83 | 69.29   | 0.06    | 0.23    |
| CR1                    | 650      | 42.15 | 9.85  | 38.31 | 9.69  | 80.46   | -0.05   | -0.01   |
| CR2                    | 3821     | 38.50 | 14.39 | 33.73 | 13.37 | 72.23   | -0.07   | -0.04   |
| CR3                    | 888      | 42.34 | 13.51 | 34.91 | 9.23  | 77.25   | -0.10   | -0.19   |

135

### 136 **PCGs and codon usage**

137 The PCGs region was 11144 bp long, and accounted 50.6% of the *L. vittata*  
 138 mitogenome. Nine of thirteen PCGs (*atp6*, *atp8*, *cob*, *cox1-3*, *nad2-3* and *nad6*) were  
 139 encoded on the light (F) strand, while the other four genes (*nad1*, *nad4L* and *nad4-5*)  
 140 were encoded on the heavy (R) strand (Table 1). Each PCG was initiated by a

141 canonical ATN codon (ATG for *atp6*, *atp8*, *nad2-5* and *cob*; ATT for *cox2* and *nad1*;  
 142 ATC for *nad6*), except for *cox1* (TTG), *nad4L* (TTG) and *cox3* (GTG) (S2 Table).  
 143 Two of the thirteen PCGs (*nad5* and *nad4*) terminated with incomplete stop codon T,  
 144 one PCG (*cox1*) terminated with stop codon TAG, and the other ten PCGs terminated  
 145 with the canonical termination codon TAA (S2 Table).  
 146 The RSCU values of *L. vittata* mitogenome were analyzed and the results were shown  
 147 in Table 2. The total number of codons in thirteen PCGs was 3714 except eleven  
 148 canonical stop codons and two incomplete stop codons and the most common amino  
 149 acids were Ile (AUR) (499), Phe (UUR) (357) and Leu2 (UUR) (315), whereas  
 150 codons encoding Cys (UGR) (41) and Met (AUR) (24) were rare (Fig 2). The overall  
 151 A + T content of thirteen PCGs was 69.79%, the AT-skews and GC-skews were  
 152 negative which implied a higher occurrence of Ts and Cs than As and Gs (Table 1).

153

154 **Table 2. The codon number and relative synonymous codon usage (RSCU) in *L. vittata***  
 155 **mitochondrial protein coding genes.**

| Codon  | Count | RSCU | Codon  | Count | RSCU | Codon  | Count | RSCU | Codon  | Count | RSCU |
|--------|-------|------|--------|-------|------|--------|-------|------|--------|-------|------|
| UUU(F) | 300   | 1.68 | UCU(S) | 129   | 2.46 | UAU(Y) | 101   | 1.57 | UGU(C) | 32    | 1.56 |
| UUC(F) | 57    | 0.32 | UCC(S) | 29    | 0.55 | UAC(Y) | 28    | 0.43 | UGC(C) | 9     | 0.44 |
| UUA(L) | 283   | 3.13 | UCA(S) | 92    | 1.76 | UAA(*) | 10    | 0.29 | UGA(W) | 92    | 2.68 |
| UUG(L) | 32    | 0.35 | UCG(S) | 12    | 0.23 | UAG(*) | 1     | 0.03 | UGG(W) | 15    | 1    |
| CUU(L) | 131   | 1.45 | CCU(P) | 101   | 2.71 | CAU(H) | 53    | 1.47 | CGU(R) | 12    | 0.4  |
| CUC(L) | 33    | 0.36 | CCC(P) | 14    | 0.38 | CAC(H) | 19    | 0.53 | CGC(R) | 2     | 0.07 |
| CUA(L) | 59    | 0.65 | CCA(P) | 28    | 0.75 | CAA(Q) | 55    | 1.62 | CGA(R) | 38    | 1.26 |
| CUG(L) | 5     | 0.06 | CCG(P) | 6     | 0.16 | CAG(Q) | 13    | 0.38 | CGG(R) | 11    | 0.36 |
| AUU(I) | 266   | 1.6  | ACU(T) | 85    | 1.95 | AAU(N) | 108   | 1.65 | AGU(S) | 45    | 0.86 |
| AUC(I) | 42    | 0.25 | ACC(T) | 23    | 0.53 | AAC(N) | 23    | 0.35 | AGC(S) | 7     | 0.13 |
| AUA(I) | 191   | 1.15 | ACA(T) | 61    | 1.40 | AAA(K) | 83    | 1.77 | AGA(S) | 93    | 3.08 |
| AUG(M) | 24    | 1    | ACG(T) | 5     | 0.11 | AAG(K) | 11    | 0.23 | AGG(S) | 25    | 0.83 |
| GUU(V) | 95    | 1.82 | GCU(A) | 93    | 2.14 | GAU(D) | 56    | 1.51 | GGU(G) | 61    | 1.06 |

|        |    |      |        |    |      |        |    |      |        |     |      |
|--------|----|------|--------|----|------|--------|----|------|--------|-----|------|
| GUC(V) | 8  | 0.15 | GCC(A) | 25 | 0.57 | GAC(D) | 18 | 0.49 | GGC(G) | 20  | 0.35 |
| GUA(V) | 87 | 1.67 | GCA(A) | 50 | 1.15 | GAA(E) | 64 | 1.35 | GGA(G) | 106 | 1.84 |
| GUG(V) | 19 | 0.36 | GCG(A) | 6  | 0.14 | GAG(E) | 31 | 0.65 | GGG(G) | 43  | 0.75 |

---

156

157 **Fig 2. RSCU and Codon distribution in the mitogenome of *L. vittata*.** The left ordinate  
158 represents RSCU, and the right ordinate represents the number of the Codon distribution.

159

## 160 **Transfer RNAs and Ribosomal RNAs**

161 The mitogenome of *L. vittata* contained twenty-two tRNAs and these genes ranged  
162 from 60 (*trnA*) to 77 bp (*trnN*) (S2 Table). The tRNAs showed a strong A +T bias  
163 (69.58%), while they also exhibited positive AT-skew (0.04) and GC-skew (0.08)  
164 (Table 1). Eight tRNAs [*trnQ* (CAA), *trnC* (UGC), *trnY* (UAC), *trnF* (UUC), *trnH*  
165 (CAC), *trnP* (CCA), *trnL1* (CUA) and *trnV* (GUA)] were present on the R strand and  
166 the remaining fourteen were present on the F strand (S2 Table). The examined  
167 secondary structure of twenty-two tRNAs was shown in S1 Fig. The other twenty-one  
168 tRNAs had typical cloverleaf secondary structure except that *trnS1* (AGA) lacked the  
169 dihydropyridine (DHU) arm [18, 19, 27, 28] (S1 Fig). In the secondary structure of  
170 the tRNAs, the most common non-Watson–Crick base pair was G–U (e.g. *trnC*, *trnE*),  
171 followed by U–U (e.g. *trnA*, *trnC*) [19]. In addition, several mismatches were  
172 common in tRNAs, such as A–C (e.g. *trnA*), C–U (e.g. *trnA*, *trnG*) and A–A (e.g.  
173 *trnM*, *trnS1*) (S1 Fig).

174 Two rRNA genes were found on the R strand. The *rrnL* was 1494 bp and *rrnS* was  
175 821 bp, one located between *trnL1* and *trnV* and another located between *trnV* and  
176 CR1 (S2 Table and Fig 1). The total A+T content of the two rRNAs was 69.29%, with  
177 a positive AT-skew (0.06) (Table 1).

## 178 **Overlapping and intergenic regions**

179 The mitogenome of *L. vittata* contained four overlapping regions, these four pairs of  
180 genes were presented: *atp8* / *atp6*, *trnE* / *trnF*, *nad4* / *nad4L* and *trnL1* / *rrnL*, with  
181 the longest 23 bp overlap located between *trnL1* and *rrnL* (S2 Table). The 27  
182 intergenic regions were found with a length varying from 2 ~ 3821 bp (S2 Table).  
183 Three putative CRs had been identified in *L. vittata* mitogenome. The CR1 was  
184 located between *rrnS* and *trnI*, with a length of 650 bp, and the A+T content was  
185 80.46%. The CR2 was located between *cox1* and *trnL2*, with a length of 3821 bp, and



186 the A+T content was 72.23%. The CR3 was located between *trnL2* and *cox2*, with a  
187 length of 888 bp, and the A+T content was 77.25% (Table 1 and S2 Table).

188 To our knowledge, this study is the first reported mitogenome from the genus  
189 *Lysmata*. How multiple CRs were generated and evolved in the mitogenome of  
190 *Lysmata* is a novel problem that has not yet been solved, and more mitogenomes of  
191 *Lysmata* are still needed to clarify the mechanism forming this phenomenon.

## 192 **Gene rearrangement**

193 Compared with the gene order of a Decapoda ancestor [20, 29], two tRNA gene (*trnA*  
194 and *trnR*) positions of *L. vittata* had translocated, which indicates that the *L. vittata*  
195 was quite unconserved in its evolution (Fig 3). In fact, gene rearrangement was a very  
196 common phenomenon in the mitogenome and the rearrangement mainly occurred in  
197 tRNA genes. Gene arrangement was stable, and it could be used as an important  
198 phylogenetic marker in the analysis of evolutionary perspective on shrimp. At present,  
199 no other species in the Hippolytidae have been tested for mitogenome, and the  
200 common characteristics of gene order were not easy to determine.

201

202 **Fig 3. Comparison of the order of mitochondrial genes of *Lysmata vittata* and the ancestor of**  
203 **Decapoda.**

204

## 205 **Phylogenetic analysis**

206 Using ML and BI analysis methods, phylogenetic analysis was performed based on  
207 the nucleotide and amino acid sequences of thirteen PCGs of the species in S1 Table,  
208 and the analysis results were presented (Fig 4 and Fig 5). The phylogenetic tree based  
209 on the nucleotide sequence of thirteen PCGs showed that the monophyly of each  
210 family was basically well supported, especially the clade of the Hippolytidae was  
211 strongly supported (ML BP = 100%; BI PP = 1). A basal split separates two clades,  
212 with insignificant support (Fig 4). The first clade revealed the two phylogenetic  
213 relationships: (Hippolytidae + (Atyidae + (Alpheidae + Palaemonidae))) and  
214 (Palinuridae + (Astacidae + (Nephropsidae + Enoplometopidae))). The second clade  
215 revealed the one phylogenetic relationship: (Sergestidae + (Solenoceridae +  
216 Penaeidae)) (Fig 4). The phylogenetic tree based on the amino acid sequence of 13  
217 PCGs revealed that the phylogenetic relationship between Hippolytidae and Atyidae  
218 has changed as follows: (Atyidae + (Hippolytidae + (Alpheidae + Palaemonidae))).  
219 However, the clade of the Hippolytidae was very weak support (ML BP = 52%; BI PP



220 = 0) (Fig 5). We could still reach a conclusion that the Hippolytidae was an older  
221 family than Atyidae, and the Atyidae formed a sister group to Alpheidae –  
222 Palaemonidae. The Caridea were dominated by Palaemonidae, followed by Alpheidae,  
223 Atyidae and Hippolytidae [30]. At present, the phylogenetic study of the Hippolytidae  
224 was limited to the partial fragments of mitochondrial genes *16S* or *12S* of individual  
225 species in several genera (such as *Lysmata*, *Exhippolysmata*, *Ligur*, *Mimocaris* and  
226 *Lysmatella*) [31-34]. The successful determination of the mitogenome of *L. vittata*  
227 could provide a deeper understanding of the phylogenetic status of the Hippolytidae.

228

229 **Fig 4. Phylogenetic tree inferred from nucleotide sequences of 13 PCGs of the mitogenome**  
230 **using ML and BI methods (BP / PP).**

231

232 **Fig 5. Phylogenetic tree inferred from amino acid sequences of 13 PCGs of the mitogenome**  
233 **using ML and BI methods (BP / PP).**

234

## 235 Conclusion

236 In this study, we successfully obtained the mitogenome sequence of the *L. vittata*,  
237 which was also the first species of the Hippolytidae to publish the mitogenome  
238 sequence in the GenBank database. The genome sequence was 22003 base pairs (bp)  
239 and it included 37 genes and three CRs. Each PCGs was initiated by a canonical ATN  
240 codon, except for *cox1*, *nad4L* and *cox3*, which were initiated by a TTG, TTG and  
241 GTG. Two of the thirteen PCGs (*nad5* and *nad4*) terminated with incomplete stop  
242 codon T, and one (*cox1*) terminated with stop codon TAG. The AT-skew (-0.04) and  
243 the GC-skew (-0.17) were both negative in the mitogenomes of *L. vittata*. Compared  
244 with the gene order of a Decapoda ancestor, the gene arrangement order of the *L.*  
245 *vittata* has changed. Furthermore, phylogenetic analyses showed that *L. vittata* was not  
246 in the clades of other families, but was an independent clade, namely the  
247 Hippolytidae.

248

## 249 Supporting information

250 **S1 Table. List of species used to construct the phylogenetic tree.**

251 (DOC)

252 **S2 Table. Summary of *Lysmata vittata* mitogenome.**

253 (DOC)

254 **S1 Fig. Predicted secondary structure for the tRNAs of *Lysmata vittata***  
255 **mitogenome.**

256 (TIF)

## 257 **Acknowledgements**

258 The authors thank the parents for their material and spiritual support.

## 259 **Author contributions**

260 **Supervision:** Zhihuang Zhu, Qi Lin, Jianxin Wang.

261 **Funding acquisition:** Zhihuang Zhu, Qi Lin, Jianxin Wang.

262 **Methodology:** Longqiang Zhu, Leiyu Zhu, Dingquan Wang.

263 **Software:** Longqiang Zhu.

264 **Writing - original draft:** Longqiang Zhu.

265 **Writing - review & editing:** Zhihuang Zhu, Qi Lin, Jianxin Wang.

## 266 **Data Availability Statement**

267 Data are available from the NCBI database (accession number MT478132).

## 268 **Funding**

269 This study was supported by the special fund of marine and Fisheries Structure  
270 Adjustment in Fujian (2017HYJG03, 2020HYJG01, 2020HYJG08), the National key  
271 R&D Program of China (2019YFD0901305), the Science and Technology Program of  
272 Zhoushan (2019C21011), the Natural Science Foundation of Zhejiang Province,  
273 China (LY12C03003) and the Province Key Research and Development Program of  
274 Zhejiang (2021C02047).

## 275 **Competing Interests**

276 The authors declare there are no competing interests.

277

## 278 **References**

- 279 1. De Grave S, Li C P, Tsang L M, Chan T Y. Unweaving hippolytoid systematics (Crustacea,  
280 Decapoda, Hippolytidae): resurrection of several families. *Zoologica Scripta*.2014; **43**:  
281 496-507. <https://doi.org/10.1111/zsc.12067>
- 282 2. Chace F A, Jr. The Caridean Shrimps (Crustacea: Decapoda) of the Albatross Philippine  
283 Expedition, 1907-1910, Part 7: Families Atyidae, Eugeonatonotidae, Rhynchocinetidae,  
284 Bathypalaemonellidae, Processidae, and Hippolytidae. *Smithsonian Contributions to Zoology*.  
285 1997; **587**: 1-106. <https://doi.org/10.5479/si.00810282.381.1>

- 286 3. Ahyong S T. New species and new records of Caridea (Hippolytidae: Pasiphaeidae) from  
287 New Zealand. *Zootaxa*.2010; 341-357. <https://doi.org/10.1163/156854009X427333>
- 288 4. Okuno, J. *Lysmata lipkei*, A new species of peppermint shrimp (Decapoda, Hippolytidae)  
289 from warm temperate and subtropical waters of Japan. *Studies on Malacostraca*. 2010;  
290 597-610. [https://doi.org/10.1163/9789047427759\\_042](https://doi.org/10.1163/9789047427759_042)
- 291 5. Marin I N, Korn O M, Kornienko E S. (2012) The caridean shrimp *Lysmata vittata* (Stimpson,  
292 1860) (Decapoda: Hippolytidae): A new species for the fauna of Russia. *Russian Journal of*  
293 *Marine Biology*. 2012; **38**. <https://doi.org/10.1134/S1063074012040062>
- 294 6. Zheng N, Sun Y X, Yang L L, Wu L, Muhammad AN, Chen C et al. Characterization of the  
295 complete mitochondrial genome of *Biston marginata* (Lepidoptera: Geometridae) and  
296 phylogenetic analysis among lepidopteran insects. *International Journal of Biological*  
297 *Macromolecules*. 2018; S0141-8130(17): 32480-32487.  
298 <https://doi.org/10.1016/j.ijbiomac.2018.02.110> PMID: 29462677
- 299 7. Shan D N. *Crustacean Biology*, Beijing: Science Press. 1993.
- 300 8. De Grave S, Fransen C H J M. Carideorum Catalogus: The recent species of the  
301 dendrobranchiate, stenopodidean, procarididean and caridean shrimps. *Zoologische*  
302 *Mededelingen*. 2011; **85**: 195-589.
- 303 9. Abdelsalam K M. First record of the exotic lysmatid shrimp *Lysmata vittata* (Stimpson, 1860)  
304 (Decapoda: Caridea: Lysmatidae) from the Egyptian Mediterranean coast. *Mediterranean*  
305 *Marine Science*. 2018; **19**: 124-131. <https://doi.org/10.12681/mms.15591>
- 306 10. Chen J, Guan R, Chang S, Du T, Zhang H, Xing H. Substoichiometrically different  
307 mitotypes coexist in mitochondrial genomes of *Brassica napus* L. *PLoS One*. 2011; **6**: e17662.  
308 <https://doi.org/10.1371/journal.pone.0017662> PMID: 21423700
- 309 11. Borgstrom E, Lundin S, Lundeberg J. Large scale library generation for high throughput  
310 sequencing. *PLoS One*. 2011; **6**: e19119. <https://doi.org/10.1371/journal.pone.0019119>  
311 PMID:21589638
- 312 12. Luo R, Liu B, Xie Y, Li Z, Huang W, Yuan J et al. SOAPdenovo2: an empirically improved  
313 memory-efficient short-read de novo assembler. *Gigascience*. 2012; **1**(1): 18.  
314 <https://doi.org/10.1186/2047-217X-1-18> PMID: 23587118
- 315 13. Haas B J, Salzberg S L, Zhu W, Pertea M, Allen J E, Orvis J et al. Automated eukaryotic  
316 gene structure annotation using EVIDENCEModeler and the Program to Assemble Spliced  
317 Alignments. *Genome Biology*.2008; **9**(1): R7. <https://doi.org/10.1186/gb-2008-9-1-r7> PMID:  
318 18190707
- 319 14. Lowe T M, Eddy S R. tRNAscan-SE: a program for improved detection of transfer RNA  
320 genes in genomic sequence. *Nucleic Acids Res*. 1997; **25**: 955-964.  
321 <https://doi.org/10.1093/nar/25.5.955> PMID: 9023104
- 322 15. Lagesen K, Hallin P, Rodland E A, Staerfeldt H H, Rognes T, Usser D W. RNAmmer:  
323 consistent and rapid annotation of ribosomal RNA genes. *Nucleic Acids Res*. 2007; **35**:  
324 3100-3108. <https://doi.org/10.1093/nar/gkm160> PMID: 17452365
- 325 16. Lohse M, Drechsel O, Bock R. OrganellarGenomeDRAW (OGDRAW): a tool for the easy  
326 generation of high-quality custom graphical maps of plastid and mitochondrial genomes.  
327 *Current Genetics*.2007; **52**: 267-274. <https://doi.org/10.1007/s00294-007-0161-y> PMID:  
328 17957369

- 329 17. Tamura K, Peterson D, Peterson N, Stecher G, Nei M, Kumar S. MEGA5: Molecular  
330 Evolutionary Genetics Analysis Using Maximum Likelihood, Evolutionary Distance, and  
331 Maximum Parsimony Methods. *Molecular Biology & Evolution*. 2011; **28**: 2731-2739.  
332 <https://doi.org/10.1093/molbev/msr121> PMID: 21546353
- 333 18. Yang Z H, Yang T T, Liu Y, Zhang H B, Tang B P, Liu Q N et al. The complete  
334 mitochondrial genome of *Sinna extrema* (Lepidoptera: Nolidae) and its implications for the  
335 phylogenetic relationships of Noctuoidea species. *International Journal of Biological*  
336 *Macromolecules*. 2019; **137**: 317-326. <https://doi.org/10.1016/j.ijbiomac.2019.06.238> PMID:  
337 31265851
- 338 19. Wang Z, Wang Z, Shi X, Wu Q, Tao Y, Guo H et al. Complete mitochondrial genome of  
339 *Parasesarma affine* (Brachyura: Sesamidae): Gene rearrangements in Sesamidae and  
340 phylogenetic analysis of the Brachyura. *International Journal of Biological Macromolecules*.  
341 2018; S0141-8130(18): 32224-4. <https://doi.org/10.1016/j.ijbiomac.2018.06.056> PMID:  
342 29908270
- 343 20. Castresana J. Selection of conserved blocks from multiple alignments for their use in  
344 phylogenetic analysis. *Mol Biol Evol*. 2000; **17**: 540–552.  
345 <https://doi.org/10.1093/oxfordjournals.molbev.a026334> PMID: 10742046
- 346 21. Ronquist F, Huelsenbeck J, Teslenko M. Draft MrBayes version 3.2 Manual: Tutorials and  
347 Model Summaries. Scarcelli. 2011; 1-103.
- 348 22. Guindon S, Gascuel O. PhyML: “A simple, fast and accurate algorithm to estimate large  
349 phylogenies by maximum likelihood”. *Systematic Biology*. 2003; **52**: 696-704.
- 350 23. Yamaoka K, Nakagawa T, Uno T. Application of Akaike's information criterion (AIC) in the  
351 evaluation of linear pharmacokinetic equations. *Journal of Pharmacokinetics and*  
352 *Biopharmaceutics*. 1978; **6**: 165-175. <https://doi.org/10.1007/BF01117450> PMID: 671222
- 353 24. Darriba D, Taboada G L, Doallo R, Posada D. jModelTest 2: more models, new heuristics  
354 and high-performance computing. *Nature Methods*. 2012; **9**: 772.  
355 <https://doi.org/10.1038/nmeth.2109> PMID: 22847109
- 356 25. Abascal F, Zardoya R, Posada D. ProtTest: selection of best-fit models of protein evolution.  
357 *Bioinformatic*. 2005; **21**: 2104–2105. <https://doi.org/10.1093/bioinformatics/bti263> PMID:  
358 15647292
- 359 26. Hillis D M, Bull J J. An Empirical Test of Bootstrapping as a Method for Assessing  
360 Confidence in Phylogenetic Analysis. *Systematic Biology*. 1993; **42**: 182-192.  
361 <https://doi.org/10.2307/2992540>
- 362 27. Zhu X Y, Xin Z Z, Liu Y, Wang Y, Huang Y, Yang Z H et al. The complete mitochondrial  
363 genome of *Clostera anastomosis* (Lepidoptera: Notodontidae) and implication for the  
364 phylogenetic relationships of Noctuoidea species. *International Journal of Biological*  
365 *Macromolecules*. 2018; S0141-8130(18): 32119-32126.  
366 <https://doi.org/10.1016/j.ijbiomac.2018.06.188> PMID: 29981329
- 367 28. Zhu X Y, Xin Z Z, Wang Y, Zhang H B, Zhang D Z, Wang Z F et al. The complete  
368 mitochondrial genome of *Clostera anachoreta* (Lepidoptera: Notodontidae) and phylogenetic  
369 implications for Noctuoidea species. *Genomics*. 2017; S0888-7543(17): 30025-30033.  
370 <https://doi.org/10.1016/j.ijbiomac.2018.06.188> PMID: 28435087
- 371 29. Shen X, Ren J, Cui Z, Sha Z, Wang B, Xiang J et al. The complete mitochondrial genomes  
372 of two common shrimps (*Litopenaeus vannamei* and *Fenneropenaeus chinensis*) and their

- 373 phylogenomic considerations. *Gene*. 2007; **403**: 98-109.  
374 <https://doi.org/10.1016/j.gene.2007.06.021> PMID: 17890021
- 375 30. Grave S D, Fransen, C H J M. Carideorum Catalogus: The recent species of the  
376 dendrobranchiate, stenopodidean, procarididean and caridean shrimps (Crustacea: Decapoda).  
377 *Zoologische Mededelingen*. 2011; **85**: 195–589.
- 378 31. Alves D F R, Lima D J M, Hirose G L, Martinez P A, Dolabella S S, Barros-Alves S D P.  
379 Morphological and molecular analyses confirm the occurrence of two sympatric *Lysmata*  
380 shrimp (Crustacea, Decapoda) in the southwestern Atlantic. *Zootaxa*. 2018; **4526**: 41–55.  
381 <https://doi.org/10.11646/zootaxa.4526.1.3> PMID: 30486089
- 382 32. Baeza J A, Fuentes M S. Exploring phylogenetic informativeness and nuclear copies of  
383 mitochondrial DNA (numts) in three commonly used mitochondrial genes: mitochondrial  
384 phylogeny of peppermint, cleaner, and semi-terrestrial shrimps (Caridea: *Lysmata*,  
385 *Exhippolysmata*, and *Merguia*). *Zoological Journal of the Linnean Society*. 2013; **168**: 699–  
386 722. <https://doi.org/10.1111/zoj.12044>
- 387 33. Baeza J A. Molecular phylogeny of broken-back shrimps (genus *Lysmata* and allies): A test  
388 of the ‘Tomlinson–Ghiselin’ hypothesis explaining the evolution of hermaphroditism.  
389 *Molecular Phylogenetics and Evolution*. 2013; **69**: 46–62.  
390 <https://doi.org/10.1016/j.ympev.2013.05.013> PMID: 23727055
- 391 34. Baeza J A. Molecular systematics of peppermint and cleaner shrimps: phylogeny and  
392 taxonomy of the genera *Lysmata* and *Exhippolysmata* (Crustacea: Caridea: Hippolytidae).  
393 *Zoological Journal of the Linnean Society*. 2010; **160**: 254–265.  
394 <https://doi.org/10.1111/j.1096-3642.2009.00605.x>



- CDS
- tRNA
- rRNA
- Other
- GC content
- GC skew+
- GC skew-

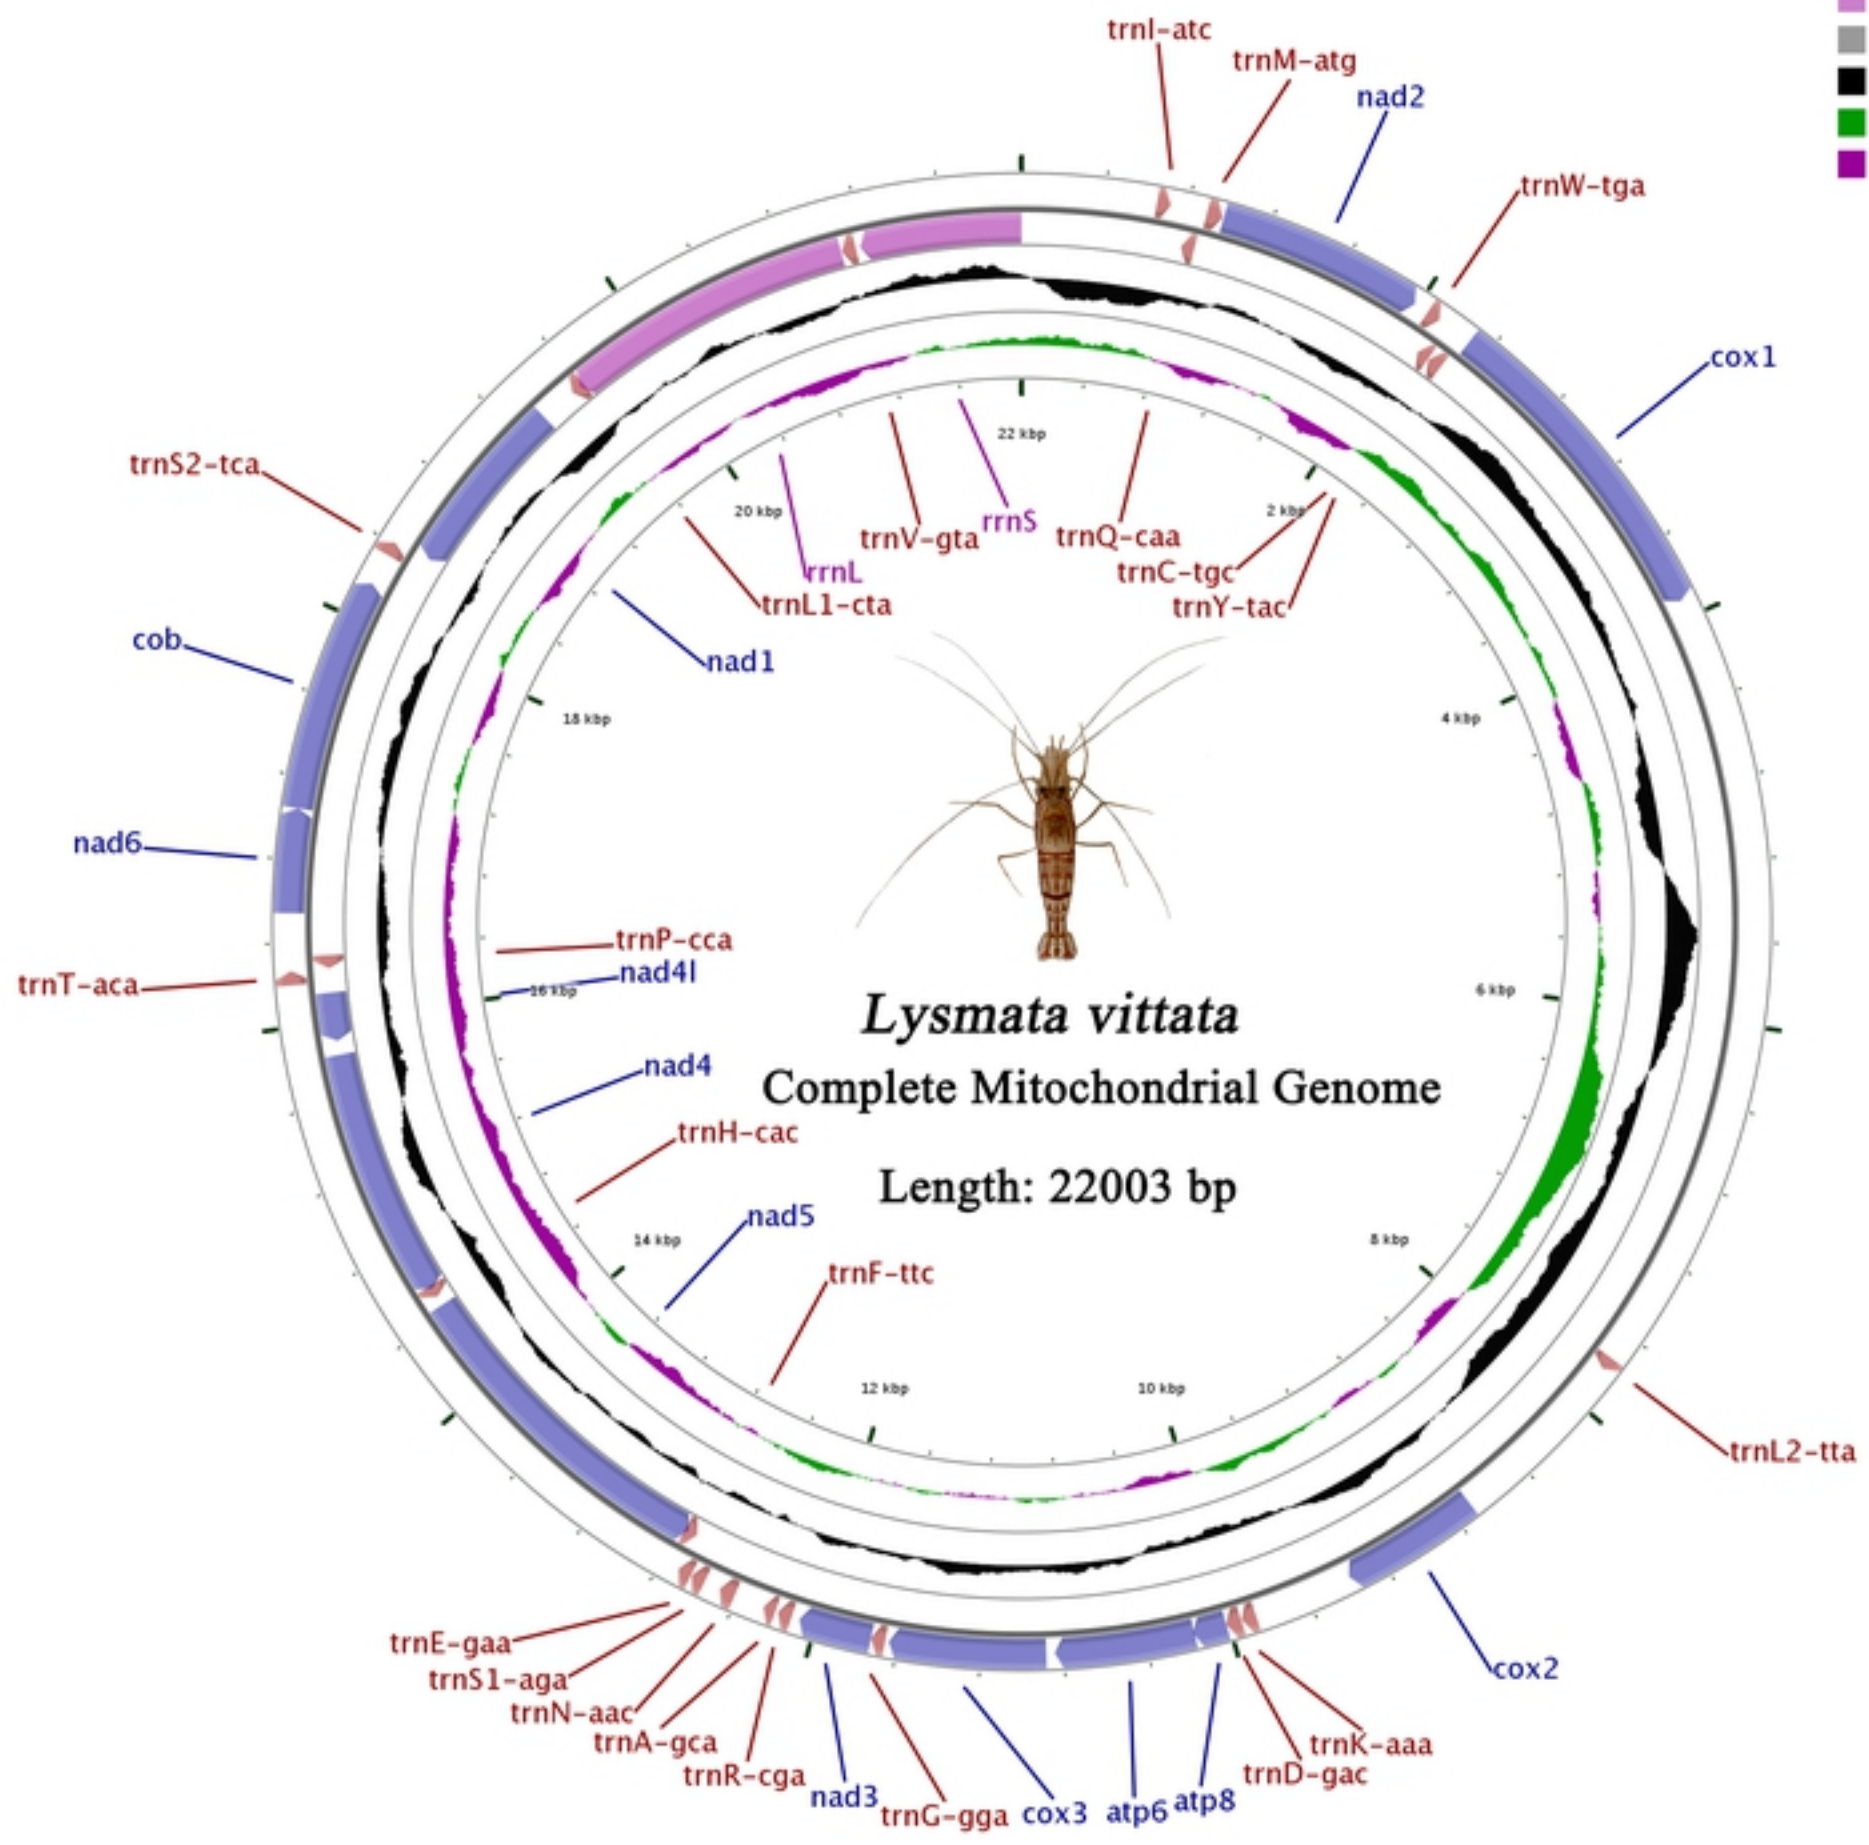

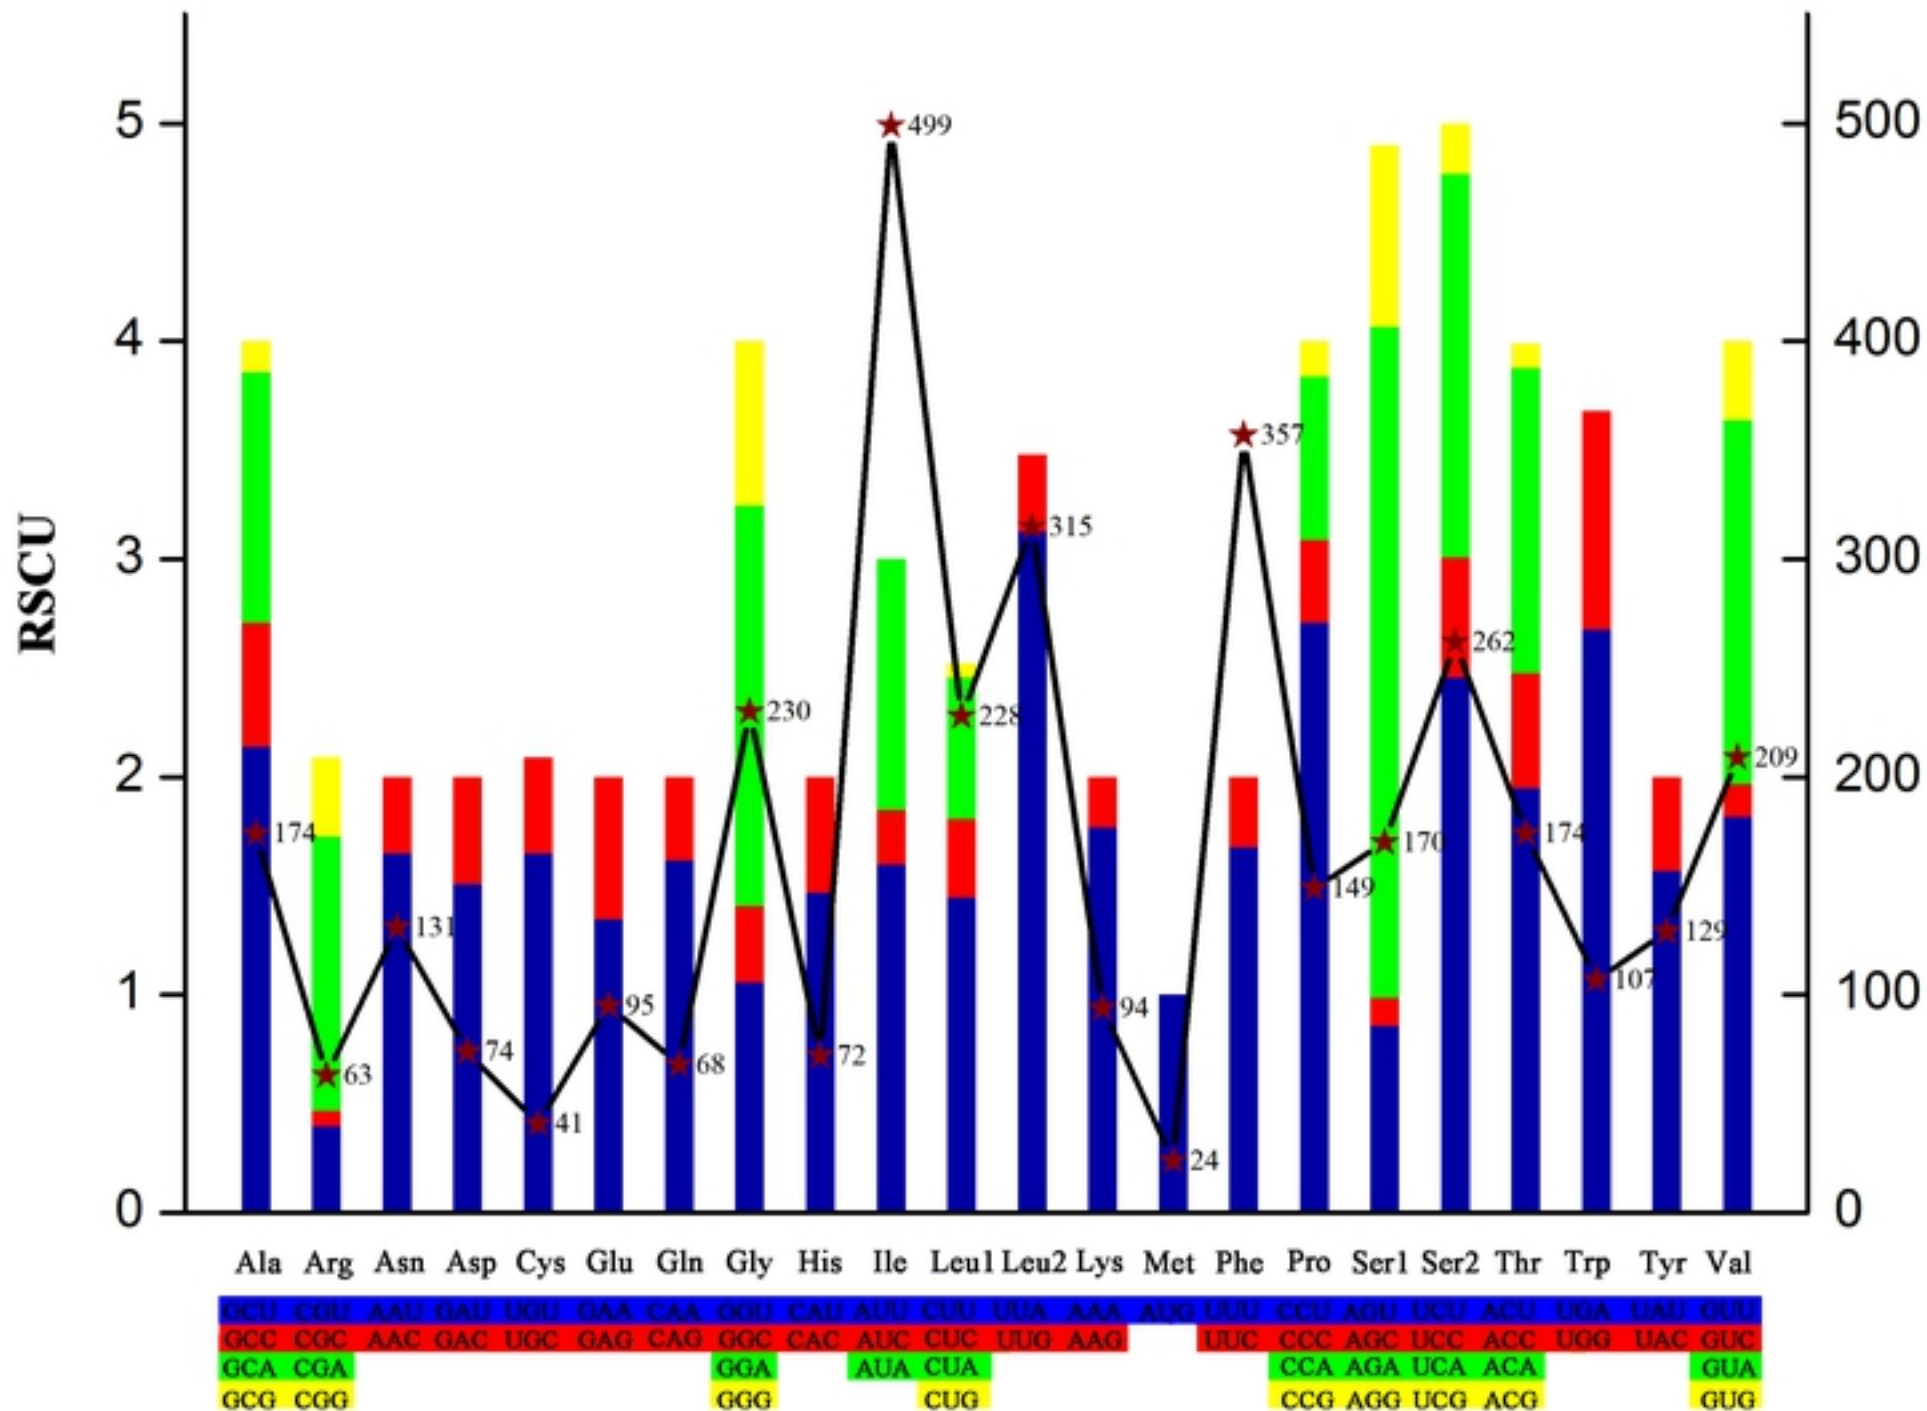



## Ancestor of Decapoda

cox1 L2 cox2 K D atp8 atp6 cox3 G nd3 A R N S1 E F nd5 H nd4 nd4L T P nd6 cob S2 nd1 L1 rrmL V rrmS CR I Q M nd2 W C Y

## *Lysmata vittata*

cox1 CR2 L2 CR3 cox2 K D atp8 atp6 cox3 G nd3 R A N S1 E F nd5 H nd4 nd4L T P nd6 cob S2 nd1 L1 rrmL V rrmS CR1 I Q M nd2 W C Y

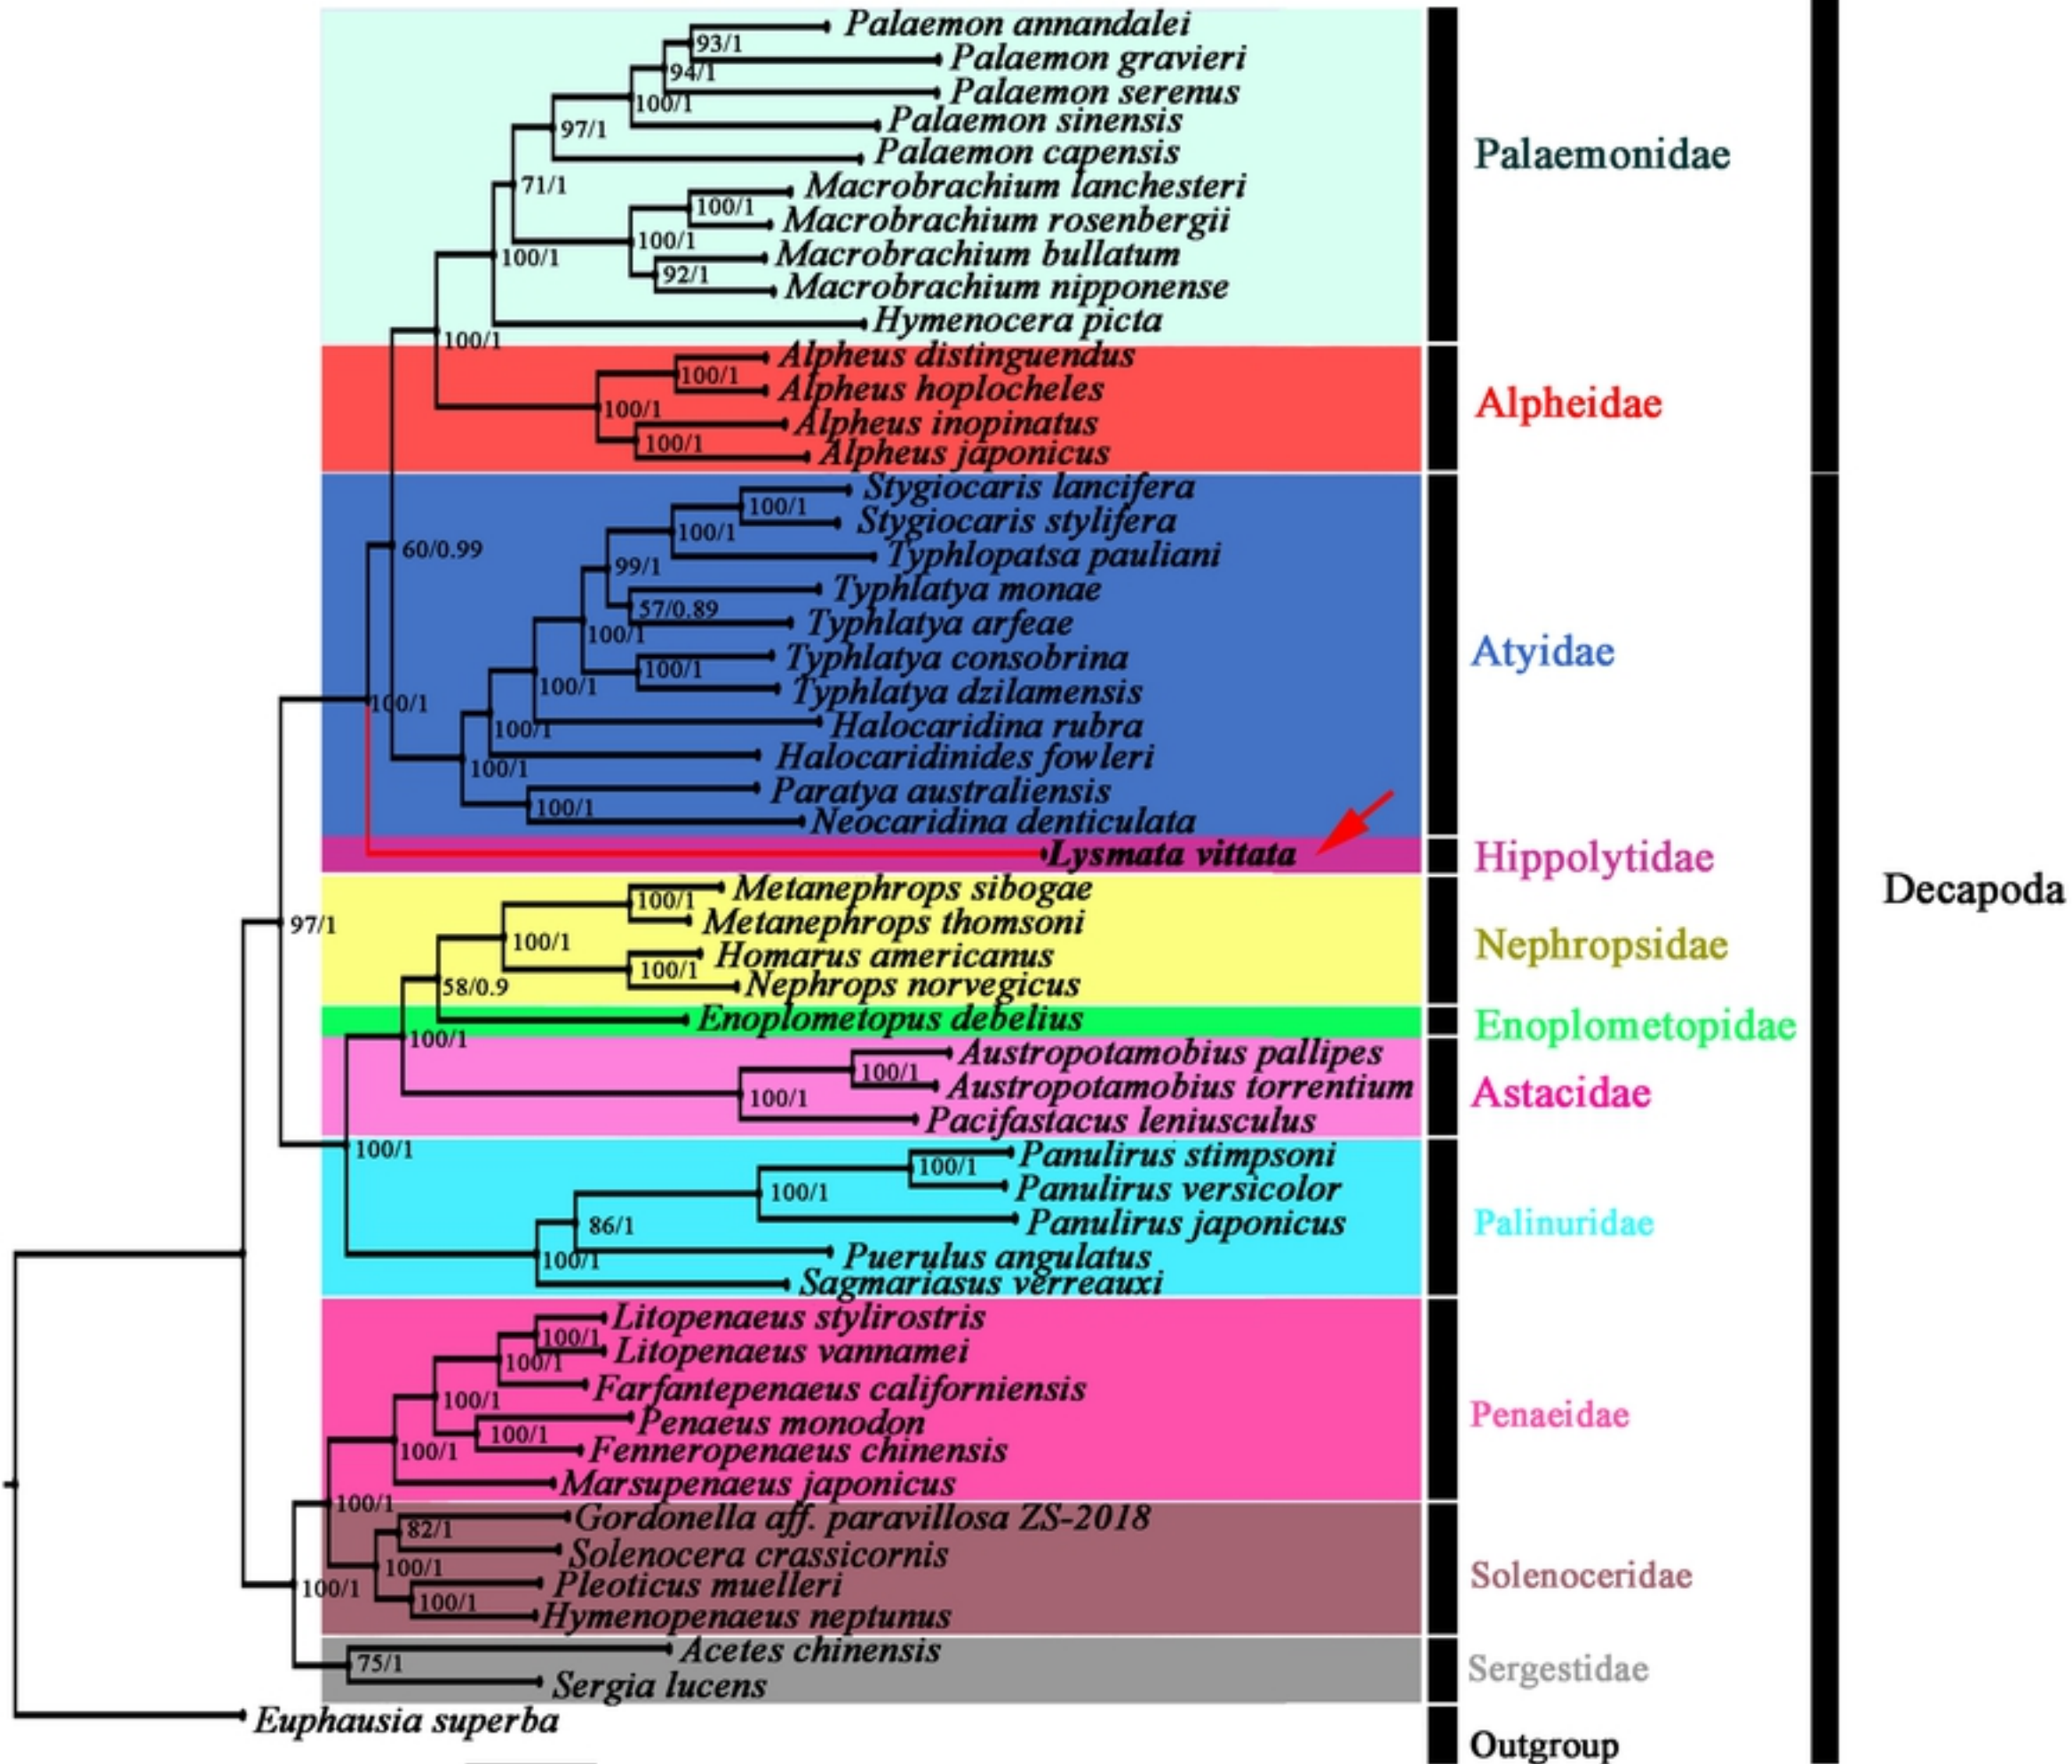



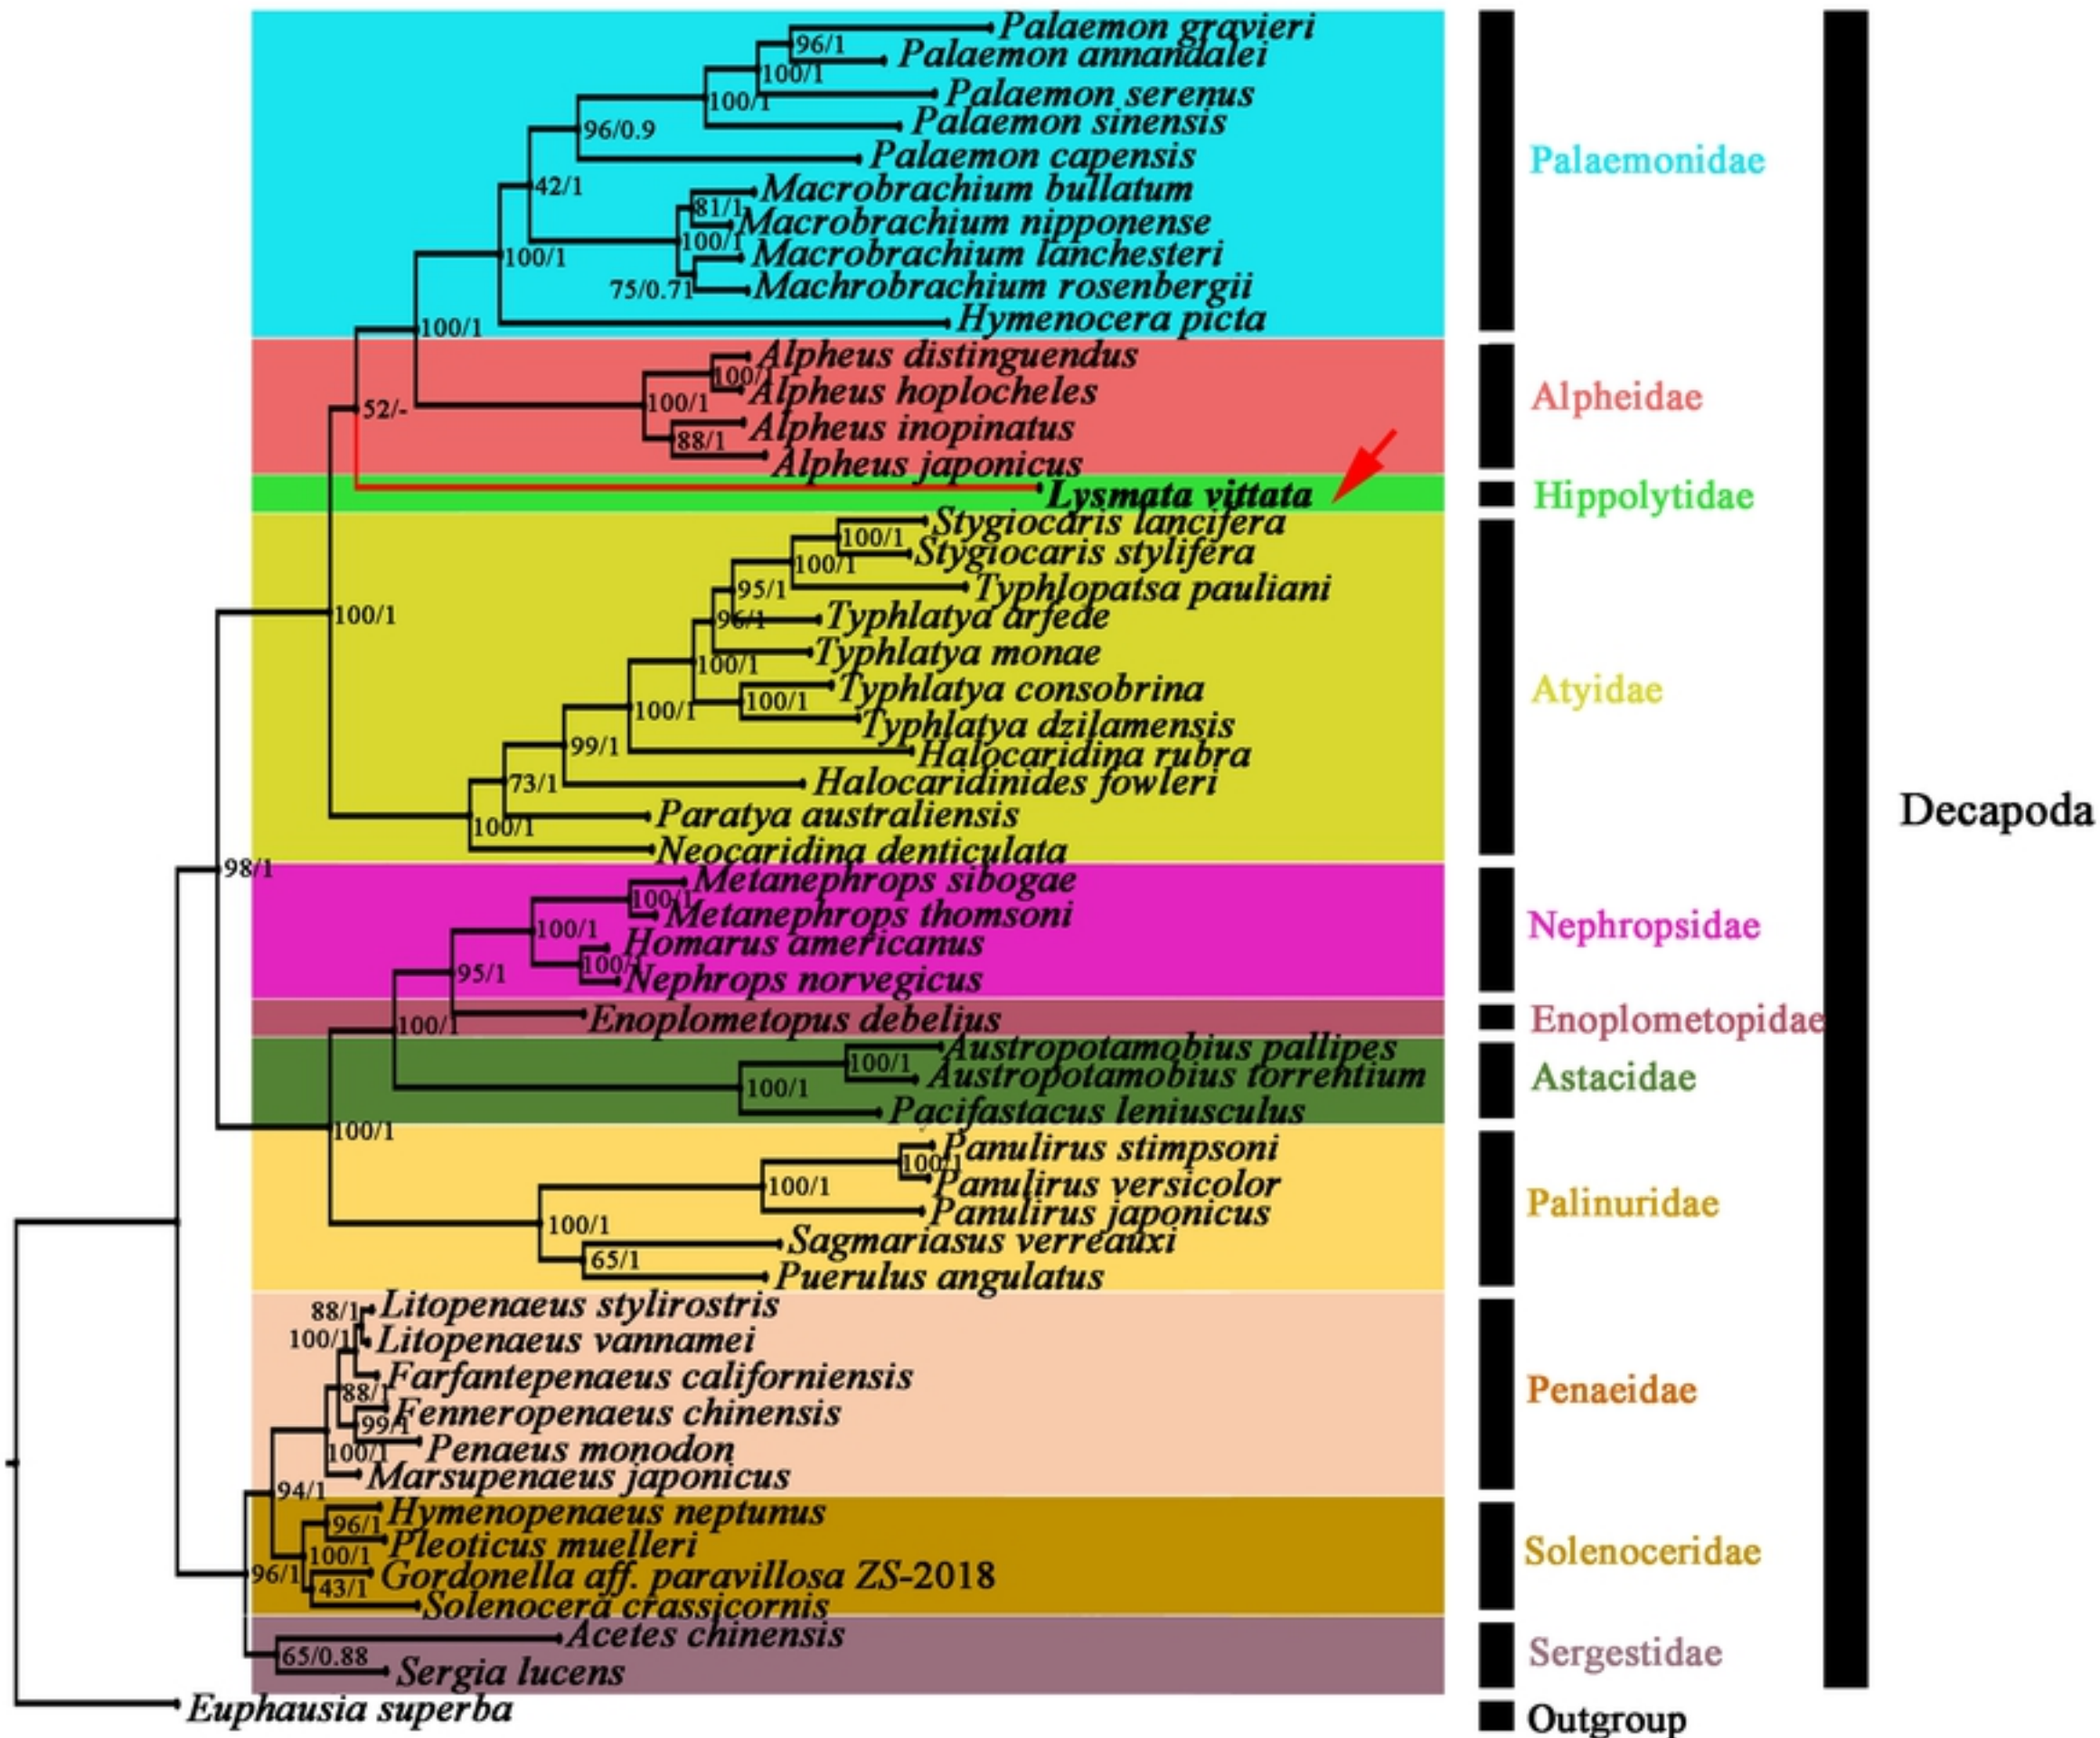

Source: https://www.biorxiv.org/content/10.1101/2021.08.04.455109v1.full.pdf
